# Supplementary material for: Randomized Open-Label Pilot Study of the Influence of Probiotics and the Gut Microbiome on Toxic Metal Levels in Tanzanian Pregnant Women and School Children
Source: PubMed Central journal article supplement — mBio. 2014 Oct 7;5(5):e01580-14. doi: 10.1128/mBio.01580-14 (PMC4196227; doi:10.1128/mbio.01580-14), 2014-10-07
Supplement: mbo005142015st1.pdf [file mbo005142015st1.pdf]

Supplementary Table 1

| Sample_ID        | Barcode |
|------------------|---------|
| v1_PDTX01_BFN100 | TATCG   |
| v1_PDTX02_BFN101 | TAGAC   |
| v1_PDTX03_BFN102 | TGCAT   |
| v1_PDTX05_BFN103 | ATGAG   |
| v1_PDTX07_BFN105 | ACAGT   |
| v1_PDTX08_BFN106 | AGATG   |
| v1_PDTX10_BFN108 | CTCAC   |
| v1_PDTX11_BFN109 | CTGTA   |
| v1_PDTX12_BFN10A | CGTGA   |
| v1_PDTX13_BFN10B | CGACT   |
| v1_PDTX15_BFN10D | AACTC   |
| v1_PDTX17_BFN10E | CCTAT   |
| v1_PDTX18_BFN10F | TTACC   |
| v1_PDTX19_BFN10G | TTCTG   |
| v1_PDTX20_BFN10H | TTGGT   |
| v1_PDTX21_BFN10I | TCTTC   |
| v1_PDTX22_BFN10J | TCAAG   |
| v1_PDTX23_BFN10K | TCCGA   |
| v1_PDTX24_BFN10L | ATTGC   |
| v1_PDTX25_BFN10M | ATCCT   |
| v1_PDTX26_BFN10N | AAGCA   |
| v1_PDTX27_BFN10P | GTTCA   |
| v1_PDTX28_BFN10Q | GACAA   |
| v1_PDTX29_BFN10R | GAGTT   |
| v1_PDTX30_BFN10S | GGTAC   |
| v1_PDTX31_BFN10T | CTAGG   |
| v1_PDTX33_BFN10U | ACGAC   |
| v1_PDTX34_BFN10V | AGCTA   |
| v1_PDTX35_BFN10W | ATACG   |
| v1_PDTX37_BFN10Y | ACCAT   |
| v1_PDTX38_BFN10Z | AGGTC   |
| v1_PDTX40_BFN110 | ACGCG   |
| v1_PDTX41_BFN111 | CACGG   |
| v1_PDTX44_BFN112 | CATAG   |
| v1_PDTX45_BFN113 | CACAT   |
| v1_PDTX46_BFN114 | CGATC   |
| v1_PDTX50_BFN115 | CGCAA   |
| v1_PDTX51_BFN116 | CGGTGT  |
| v1_PDTX57_BFN117 | GCTTA   |
| v1_PDTX58_BFN118 | GATCT   |

|                 |        |
|-----------------|--------|
| v2_PDX02_BFP100 | GTATC  |
| v2_PDX05_BFP102 | GCGAT  |
| v2_PDX06_BFP103 | GCATG  |
| v2_PDX07_BFP104 | GTAGA  |
| v2_PDX08_BFP105 | GTCGT  |
| v2_PDX10_BFP106 | TAGGA  |
| v2_PDX11_BFP107 | TACGT  |
| v2_PDX12_BFP108 | TGGCT  |
| v2_PDX13_BFP109 | TGATA  |
| v2_PDX14_BFP10A | TCAGC  |
| v2_PDX15_BFP10B | TTAAGG |
| v2_PDX17_BFP10C | TTCAAC |
| v2_PDX19_BFP10E | TTCCGT |
| v2_PDX20_BFP10F | TTCGCA |
| v2_PDX22_BFP10G | TTGTGA |
| v2_PDX23_BFP10H | TTGACT |
| v2_PDX24_BFP10I | TATAGC |
| v2_PDX25_BFP10J | TACCAA |
| v2_PDX26_BFP10K | TCTACA |
| v2_PDX27_BFP10L | TCTCGG |
| v2_PDX29_BFP10M | TCATGT |
| v2_PDX33_BFP10N | TCGCTT |
| v2_PDX34_BFP10P | TGTCTA |
| v2_PDX35_BFP10Q | TGTGCC |
| v2_PDX36_BFP10R | TGACAG |
| v2_PDX38_BFP10S | TGCACG |
| v2_PDX40_BFP10T | ATTCTC |
| v2_PDX41_BFP10U | ATGCAA |
| v2_PDX45_BFP115 | AATCCA |
| v2_PDX46_BFP116 | AATGGT |
| v2_PDX50_BFP117 | AACTAG |
| v2_PDX57_BFP119 | AACACT |
| v2_PDX58_BFP11A | AAGAGA |
| v2_PDX51_BFP118 | ACATTG |
