# Supplementary material for: Randomized Open-Label Pilot Study of the Influence of Probiotics and the Gut Microbiome on Toxic Metal Levels in Tanzanian Pregnant Women and School Children
Source: PubMed Central journal article supplement — mBio. 2014 Oct 7;5(5):e01580-14. doi: 10.1128/mBio.01580-14 (PMC4196227; doi:10.1128/mbio.01580-14), 2014-10-07
Supplement: mbo005142015st2.pdf [file mbo005142015st2.pdf]

OTU\_106 Firmicutes;unclassified;unclassified;unclassified;unclassified  
OTU\_107 Firmicutes;Clostridia;Clostridiales;unclassified;unclassified;unclassified  
OTU\_109 unclassified;unclassified;unclassified;unclassified;unclassified;unclassified  
OTU\_111 Proteobacteria;Gammaproteobacteria;unclassified;unclassified;unclassified;unclassified  
OTU\_112 Bacteroidetes;Bacteroidia;Bacteroidales;unclassified;unclassified;unclassified  
OTU\_115 Firmicutes;Clostridia;Clostridiales;Peptococcaceae1;unclassified;unclassified  
OTU\_118 Firmicutes;Bacilli;Lactobacillales;unclassified;unclassified;unclassified  
OTU\_123 Firmicutes;Clostridia;Clostridiales;Lachnospiraceae;Roseburia;intestinalis  
OTU\_124 unclassified;unclassified;unclassified;unclassified;unclassified;unclassified  
OTU\_126 Firmicutes;Clostridia;Clostridiales;Ruminococcaceae;unclassified;unclassified  
OTU\_127 Bacteroidetes;Bacteroidia;Bacteroidales;Bacteroidaceae;Bacteroides;intestinalis  
OTU\_128 Firmicutes;Clostridia;Clostridiales;Lachnospiraceae;Roseburia;unclassified  
OTU\_129 Bacteroidetes;Bacteroidia;Bacteroidales;Prevotellaceae;Prevotella;unclassified  
OTU\_130 Firmicutes;Clostridia;Clostridiales;Ruminococcaceae;unclassified;unclassified  
OTU\_131 Bacteroidetes;Bacteroidia;Bacteroidales;Prevotellaceae;Prevotella;bryantii  
OTU\_132 Actinobacteria;Actinobacteria;Bifidobacteriales;Bifidobacteriaceae;Bifidobacterium;unclassified  
OTU\_133 Bacteroidetes;Bacteroidia;Bacteroidales;Prevotellaceae;Prevotella;albensis  
OTU\_135 Firmicutes;Clostridia;Clostridiales;Ruminococcaceae;Eubacterium;siraenum  
OTU\_136 Firmicutes;Bacilli;unclassified;unclassified;unclassified;unclassified  
OTU\_138 Proteobacteria;Epsilonproteobacteria;Campylobacteriales;Campylobacteraceae;Campylobacter;rupsalienis  
OTU\_140 Firmicutes;Bacilli;Lactobacillales;Lactobacillaceae;Lactobacillus;casei group  
OTU\_143 Bacteroidetes;Bacteroidia;Bacteroidales;Prevotellaceae;Prevotella;brevis  
OTU\_146 Bacteroidetes;Bacteroidia;Bacteroidales;Prevotellaceae;Prevotella;unclassified  
OTU\_147 Bacteroidetes;Bacteroidia;Bacteroidales;Bacteroidaceae;Bacteroides;eggerthii  
OTU\_149 Proteobacteria;Betaproteobacteria;unclassified;unclassified;unclassified;unclassified  
OTU\_154 unclassified;unclassified;unclassified;unclassified;unclassified;unclassified  
OTU\_155 Firmicutes;Negativicutes;Selenomonadales;Acidaminococcaceae;Phascolarctobacterium;succinatutens  
OTU\_156 Firmicutes;Bacilli;unclassified;unclassified;unclassified;unclassified  
OTU\_157 Firmicutes;Clostridia;Clostridiales;Lachnospiraceae;Clostridium;unclassified  
OTU\_158 Proteobacteria;Betaproteobacteria;Burkholderiales;Sutterellaceae;Sutterella;wadsworthensis  
OTU\_159 Firmicutes;Clostridia;Clostridiales;Ruminococcaceae;unclassified;unclassified  
OTU\_160 Firmicutes;Clostridia;Clostridiales;Lachnospiraceae;unclassified;unclassified  
OTU\_161 Firmicutes;Clostridia;Clostridiales;Eubacteriaceae;Eubacterium;unclassified  
OTU\_163 Firmicutes;Clostridia;Clostridiales;unclassified;unclassified;unclassified  
OTU\_164 Firmicutes;Clostridia;Clostridiales;Lachnospiraceae;unclassified;unclassified  
OTU\_166 Bacteroidetes;unclassified;unclassified;unclassified;unclassified;unclassified  
OTU\_167 unclassified;unclassified;unclassified;unclassified;unclassified;unclassified  
OTU\_169 Firmicutes;unclassified;unclassified;unclassified;unclassified;unclassified  
OTU\_171 Firmicutes;Clostridia;Clostridiales;Lachnospiraceae;unclassified;unclassified  
OTU\_172 unclassified;unclassified;unclassified;unclassified;unclassified;unclassified  
OTU\_176 Actinobacteria;Actinobacteria;Bifidobacteriales;Bifidobacteriaceae;Bifidobacterium;unclassified  
OTU\_177 Firmicutes;Clostridia;Clostridiales;Lachnospiraceae;Ruminococcus;unclassified  
OTU\_178 Firmicutes;Clostridia;Clostridiales;Ruminococcaceae;unclassified;unclassified  
OTU\_179 Firmicutes;Negativicutes;Selenomonadales;Veillonellaceae;unclassified;unclassified  
OTU\_180 Firmicutes;Negativicutes;Selenomonadales;Acidaminococcaceae;Phascolarctobacterium;unclassified  
OTU\_182 Actinobacteria;Actinobacteria;Bifidobacteriales;Bifidobacteriaceae;Bifidobacterium;unclassified  
OTU\_184 unclassified;unclassified;unclassified;unclassified;unclassified;unclassified  
OTU\_185 Firmicutes;Clostridia;Clostridiales;Lachnospiraceae;unclassified;unclassified  
OTU\_190 unclassified;unclassified;unclassified;unclassified;unclassified;unclassified  
OTU\_192 Firmicutes;Negativicutes;Selenomonadales;Veillonellaceae;Anaerovibrio;unclassified  
OTU\_193 Firmicutes;Clostridia;Clostridiales;Lachnospiraceae;Ruminococcus;unclassified  
OTU\_201 Firmicutes;unclassified;unclassified;unclassified;unclassified;unclassified  
OTU\_207 Firmicutes;Negativicutes;Selenomonadales;Veillonellaceae;unclassified;unclassified  
OTU\_211 Firmicutes;Clostridia;Clostridiales;Lachnospiraceae;Ruminococcus;unclassified  
OTU\_213 Firmicutes;Clostridia;Clostridiales;Lachnospiraceae;unclassified;unclassified  
OTU\_215 Proteobacteria;Gammaproteobacteria;unclassified;unclassified;unclassified;unclassified  
OTU\_217 Firmicutes;unclassified;unclassified;unclassified;unclassified;unclassified  
OTU\_219 Firmicutes;unclassified;unclassified;unclassified;unclassified;unclassified  
OTU\_221 Bacteroidetes;Bacteroidia;Bacteroidales;Bacteroidaceae;Bacteroides;caccae  
OTU\_228 Firmicutes;Clostridia;Clostridiales;Lachnospiraceae;Roseburia;unclassified  
OTU\_229 Firmicutes;Erysipelotrichia;Erysipelotrichales;Erysipelotrichaceae;unclassified;unclassified  
OTU\_234 Firmicutes;Clostridia;Clostridiales;Ruminococcaceae;Ruminococcus;unclassified  
OTU\_237 Bacteroidetes;Bacteroidia;Bacteroidales;Prevotellaceae;Prevotella;unclassified  
OTU\_243 unclassified;unclassified;unclassified;unclassified;unclassified;unclassified  
OTU\_272 Bacteroidetes;Bacteroidia;Bacteroidales;Prevotellaceae;Prevotella;unclassified  
OTU\_275 Actinobacteria;Actinobacteria;Bifidobacteriales;Bifidobacteriaceae;Bifidobacterium;unclassified  
OTU\_276 Proteobacteria;Alphaproteobacteria;unclassified;unclassified;unclassified;unclassified  
OTU\_282 Firmicutes;unclassified;unclassified;unclassified;unclassified;unclassified  
OTU\_298 Firmicutes;Bacilli;Bacillales;Paenibacillaceae;Paenibacillus;unclassified  
OTU\_301 unclassified;unclassified;unclassified;unclassified;unclassified;unclassified  
OTU\_312 unclassified;unclassified;unclassified;unclassified;unclassified;unclassified  
OTU\_319 Bacteroidetes;Bacteroidia;Bacteroidales;Prevotellaceae;Prevotella;unclassified  
OTU\_327 unclassified;unclassified;unclassified;unclassified;unclassified;unclassified  
OTU\_330 Proteobacteria;Gammaproteobacteria;unclassified;unclassified;unclassified;unclassified  
OTU\_335 Firmicutes;Clostridia;Clostridiales;unclassified;unclassified;unclassified  
OTU\_344 Bacteroidetes;Bacteroidia;Bacteroidales;Prevotellaceae;Prevotella;unclassified  
OTU\_362 Firmicutes;Clostridia;Clostridiales;Lachnospiraceae;unclassified;unclassified  
OTU\_388 Proteobacteria;Gammaproteobacteria;Pasteurellales;Pasteurellaceae;unclassified;unclassified  
OTU\_401 Firmicutes;Clostridia;Clostridiales;Lachnospiraceae;Oribacterium;unclassified  
OTU\_408 Firmicutes;Clostridia;Clostridiales;unclassified;unclassified;unclassified  
OTU\_424 Proteobacteria;Alphaproteobacteria;Rhizobiales;unclassified;unclassified;unclassified

TGGTCTTGACATCCCGATGACAGATCTGTAATGAGATCTTACTCGGTACATTGGAGACAGGTGGTGCATGTT  
AGGACTTGACATCCAACTAACGAAGTAGAGATACATAGGTGCTCGGGAAGGATGACAGAGGGTGGTGCATGTT  
AAGACTTGACATCCAGAACTTTAAGAGTAGAGGTTGCTCTCGGAAGCTTAAGACAGTGGTGCATGCGTT  
TATCTTCAATCCAGAACTTTCCAGAGATGGATTGCTTCTCGGACACTGGTGCAGAGCTGGTGCATGCT  
CGGCTTGAATCCAGTACGATGACAGACGCATATTTCTCGGACACTGGTGGAGTGGTGCATGTT  
GGGCTTGACATCCAGAACTTTAAGAGATAGGAGTGGTCTCGGGAAGCTTAAGACAGTGGTGCATGTT  
AGGCTTGACATCCCTACTAACGAAGTAGAGATACATAGGTGCTCGGGAAGGATGACAGAGGGTGGTGCATGTT  
AAGTCTTGACATCCCGATGACAGAACTGTAATGTTTCTCGGAGCATCGTGCAGAGTGGTGCATGTT  
AGGCTTGACATCCCACTAACTTACAGAGATGAAGTGTCTTCCGGAACATGAAACAGGTTGGTGCATGTT  
AGGCTTGACATCCCTTACGCGATGCTTAATCGTATCTTCTCGGAGCATGAGAGACAGTGGTGCATGTT  
CGGGCTTAAATGCAACTGACGATTTGAAACAGATCTTCCGGAAGTGTGAAGTGGTGCATGTT  
AAGTCTTGACATCCCGTACCGGTGACGACTTCTTCCGGAACAGCTGGTGCAGTGGTGCATGTT  
CGGGCTTGAATGACAGGAAAGATTGGAGACAATGACGCTCGGGGTTCTGTGAAGTGGTGCATGTT  
AGGCTTGACATCGAGTACGAACTGAGATGATGTTTCTCGGACACAAGACAGTGGTGCATGTT  
CGGGCTTGAATGACAGGAACTGAGAGATGAGGACTTCCGGAACATGAAACAGTGGTGCATGTT  
TAGCTTGACATCCAGGAATCTTGAAGATCAGGAGTCCGCGGAGGAAATGAGACAGTGGTGCATGTT  
CAGGCTCGAAAGGCTTGAATCTGACAGATGAGGAGTCCGGAACAGTGCAGAGTGGTGCATGTT  
AAGGCTTGACATGATTGACCGCTCAGAGATGAGGCTTCTCGGGAACATGAAACAGTGGTGCATGTT  
AGGCTTGACATCCCTAGCCGCTGAGATGAGATGTTTCTCGGAGCATGAGGACAGTGGTGCATGTT  
AAGTCTTGACATCCAGCAACTGACGCTTAAACCGAATTTCTCGGAGCATGAGGACAGTGGTGCATGTT  
TAGCTTGACATCCAGGAAGTCTGAGAGATGACAGCTTCCGGAAGGAAATGAGACAGTGGTGCATGTT  
AGGCTTGACATCCAGTACGCTTCTGAGATAGGAATCTTCCGGAACATGAAACAGTGGTGCATGTT  
AAGTCTTGACATCCCACTGACCGTCAATGATGACTTCTTCCGGAACAGTGGTGCAGTGGTGCATGTT  
AAGTCTTGACATCCCTGACCGTACTAATCGTATCTTCTCGGAGCAGGAGTGCAGTGGTGCATGTT  
AAGTCTTGACATCCCTGACAGATGTAATGACTTCTTCCGGAACAGGAGACAGTGGTGCATGTT  
AAGTCTTGACATCCGACAGCTAGAAATACGTTTCTCGGGAACATGAAACAGTGGTGCATGTT  
AGGCTTGACATGAGTGAAGGCTTACAGATAGGCTTCTCGGAGACAGAAACAGTGGTGCATGTT  
AAGGCTTGACATCCCTGACAGAGTATGTAATGACTTCTTCCGGAACAGGAGACAGTGGTGCATGTT  
AAGCTTGACATCCGCAACTGAGAAATACGTTTCTCGGGAACATGAAACAGTGGTGCATGTT  
AGGCTTGACATGATTGAACTCTAGAGATAGAGGCTTCTCGGAGACAGAAACAGTGGTGCATGTT  
AAATCTGACATCCCTGACCGCTTAAATCGAGTCTTCTCGGGAACATGAAACAGTGGTGCATGTT  
AAGTCTTGACATCCCTGACCGCTTAAATCGAGTCTTCTCGGAGCATGAGGACAGTGGTGCATGTT  
TGGCTTGACATCCAGCAACTCTTAAAGATAGAGAGTGGTCTTCCGGAACATGAAACAGTGGTGCATGTT  
AAGTCTTGACATCCCTTGAAGAACCGCTAACGGGCTTCTCGGAGCATGAGACAGTGGTGCATGTT  
AGGCTTGACATCCGATGATAGATAGTGAAGTGAAGTGAAGTGAAGTGAAGTGAAGTGAAGTGAAGTGAAGT  
AGGCTTGACATGATTGAACTCTAGAGATAGGAGCTTCTCGGAGACAGAAACAGTGGTGCATGTT  
TGGCTTGACATCCCGTACCGCTCGAATGGAGCTTCTCGGGAACAGGAGACAGTGGTGCATGTT  
AAGACTTGACATCCCGCAAGCTATAGAAATAGTGAAGTGAAGTGAAGTGAAGTGAAGTGAAGTGAAGTGAAGT  
AGGCTTGACATGATTGAACTCTAGAGATAGAGGCTTCTCGGAGACAGAAACAGTGGTGCATGTT  
AAATCTGACATCCCTGACCGCTTAAATCGAGTCTTCTCGGGAACATGAAACAGTGGTGCATGTT  
AGGCTTGACATCCCACTGACCGTCTGTAATGAACTTCTCGGAGCATGAGGACAGTGGTGCATGTT  
TGATCTTGACATCGTAAAGCACTCACTGAAGAGTGGAGGCTTCCGGAACATGAAACAGTGGTGCATGTT  
TGGCTTGACATCCCTGAAATCGGCTAAAGCGGATAGGCTCGGGAACATGAAACAGTGGTGCATGTT  
AGGCTTGACATCCATGAAAGTCTAAGAGATAGGACTTACGAGCATGATACAGTGGTGCATGTT  
CGGCTTAAATGCAATGAAATGGGGAACCCATAGCCCTAAGGCAATTTGTGAAGTGGTGCATGTT  
AAGTCTTGACATCCCGATGACAGATGTAATGACTTCTTCCGGAACAGTGGTGCATGTT  
AGGCTTGACATCCCTGCAAACTCTGAGAGATGAGGAGGAGGCTCAAGGACAGAGTGGTGCATGTT  
AGGCTTGACATCGAGTACTAGAGATAGTACTTCTCGGGAACATGAAACAGTGGTGCATGTT  
CGGGCTGAAATGACAGGAAAGGATACAGAGATGTTGACGCTTCCGGAACATGAAACAGTGGTGCATGTT  
AGGCTTGACATCAACTAATAACTAAGAGTGTAGTCTTCTCGGAGAAAGTAAAGACAGTGGTGCATGTT  
CGGCTTGAATGACAGGCAAGGATACAGAGATGATGAGGCTTCCGGAACATGAAACAGTGGTGCATGTT  
TGGCTTGACATGTTCCGACAGCCGATGAGATAGGCTTCCGGAACATGAAACAGTGGTGCATGTT  
AACTCTGACATCCATCGGGGAGGACAGAGATGTTCTTCTCAGTGGTGGATGATGACAGTGGTGCATGTT  
AGGCTTGACATGATCGTACTGCAAAATGCGGAGTCTTCTCGGAGACAGGAAACAGTGGTGCATGTT  
AGGCTTGACATCCAACTAACGAAGCAGAGATGATAGGCTTCCGGAAGTGGTGCATGTT  
AGGCTTGACATCCAGGAACTCTGAGAGATACGGAGTCTTCCGGAACATGAAACAGTGGTGCATGTT  
CGGGCTCAAAGCACTAGGCGACAGGAAATGTTTCTTAGGAGCATGAGGAGTGGTGCATGTT  
AGGCTTGACATGATTGCAAGCATAAGAGATAGGCTTCCGGAACATGAAACAGTGGTGCATGTT  
AGGCTTGACATGATTGCAAGCATAAGAGATAGGCTTCCGGAACATGAAACAGTGGTGCATGTT  
TGAATGACATAGTAGGAACTTTAAGAGATGAGAGTGGCAGGAGGCTGCACTGACAGTGGTGCATGTT  
AGGCTTGACATCAAGTACCCTGATAGAGATAGGCTTCTTCCGGAACATGAAACAGTGGTGCATGTT  
AGGCTTGACATGATTGCAAGCATAAGAGATGATGAGGCTTCCGGAACATGAAACAGTGGTGCATGTT  
AGGCTTGACATCAAGTACAGTCTAAGAGATGAGGCTTCCGGAACATGAAACAGTGGTGCATGTT  
AGGCTTGACATCAAGTACAGTCTAAGAGATGAGGCTTCCGGAACATGAAACAGTGGTGCATGTT  
AAGCTTGACATCCCACTGACAGATGATGTAATGACTTCTTCCGGAACATGAAACAGTGGTGCATGTT  
AGGCTTGACATCCGATGATAGAGATGTAAGTGAAGTCTTCCGGAACATGAAACAGTGGTGCATGTT  
GACCTTGACATCCCGCAAGCTTCCAGAGATGTTGTTCTTACTTCCGAGTGGTGCATGTT
